# Supplementary material for: First record and morphological characterization of an established population of Aedes (Hulecoeteomyia) koreicus (Diptera: Culicidae) in Germany
Source: PubMed Central journal article supplement (PMC6296035; doi:10.1186/s13071-018-3199-4), 2018-12-17
Supplement: 13071_2018_3199_MOESM1_ESM.pdf [file 13071_2018_3199_MOESM1_ESM.pdf]

| Site no. | Category            | Species                       | 10-Aug-2017 | 30-Aug-2017 | 20-Oct-2017 |
|----------|---------------------|-------------------------------|-------------|-------------|-------------|
| 1        | Sonnenberg cemetery | <i>Ae. koreicus</i>           | 121         | 29          | 8           |
|          |                     | <i>Ae. j. japonicus</i>       | 1           |             |             |
|          |                     | <i>Cx. pipiens/torrentium</i> | 80          | 18          |             |
| 2        | Field/garden        | <i>Ae. koreicus</i>           | 3           | 6           |             |
|          |                     | <i>Ae. j. japonicus</i>       |             |             |             |
|          |                     | <i>Cx. pipiens/torrentium</i> | 264         | 50          |             |
| 3        | Forest              | <i>Ae. koreicus</i>           | 131         |             |             |
|          |                     | <i>Ae. j. japonicus</i>       |             |             |             |
|          |                     | <i>Cx. pipiens/torrentium</i> | 73          | 2           |             |
| 4        | Forest              | <i>Ae. koreicus</i>           |             | 44          | 58          |
|          |                     | <i>Ae. j. japonicus</i>       |             | 32          | 24          |
|          |                     | <i>Cx. pipiens/torrentium</i> |             | 13          |             |
| 5        | Field/garden        | <i>Ae. koreicus</i>           | 11          | 21          |             |
|          |                     | <i>Ae. j. japonicus</i>       |             |             |             |
|          |                     | <i>Cx. pipiens/torrentium</i> | 114         | 6           |             |
| 6        | Forest              | <i>Ae. koreicus</i>           |             | 85          |             |
|          |                     | <i>Ae. j. japonicus</i>       | 2           | 43          |             |
|          |                     | <i>Cx. pipiens/torrentium</i> | 33          | 42          |             |
| 7        | Field/garden        | <i>Ae. koreicus</i>           | 37          | 35          |             |
|          |                     | <i>Ae. j. japonicus</i>       | 35          | 43          |             |
|          |                     | <i>Cx. pipiens/torrentium</i> | 62          |             |             |
| 8        | Bierstadt cemetery  | <i>Ae. koreicus</i>           | 76          | 26          |             |
|          |                     | <i>Ae. j. japonicus</i>       |             |             |             |
|          |                     | <i>Cx. pipiens/torrentium</i> | 158         | 40          | 32          |
| 9        | Industrial area     | <i>Ae. koreicus</i>           | 104         |             |             |
|          |                     | <i>Ae. j. japonicus</i>       |             |             |             |
|          |                     | <i>Cx. pipiens/torrentium</i> | 66          |             |             |
