# Supplementary material for: First record and morphological characterization of an established population of Aedes (Hulecoeteomyia) koreicus (Diptera: Culicidae) in Germany
Source: PubMed Central journal article supplement (PMC6296035; doi:10.1186/s13071-018-3199-4), 2018-12-17
Supplement: 13071_2018_3199_MOESM2_ESM.pdf [file 13071_2018_3199_MOESM2_ESM.pdf]

| <b>Characteristic</b>                     | <b><i>Ae. koreicus</i></b> | <b><i>Ae. j. japonicus</i></b> |
|-------------------------------------------|----------------------------|--------------------------------|
| <b>No. of pedicel scales</b>              | n=43                       | n=30                           |
| Less dark than pale scales                | 40                         | 1                              |
| No. of dark and pale scales similar       | 3                          | 1                              |
| More dark than pale scales                | 0                          | 28                             |
| <b>No. of pale fork scales</b>            | n=43                       | n=30                           |
| 0                                         | 40                         | 11                             |
| 1-5                                       | 3                          | 14                             |
| 6-10                                      | 0                          | 4                              |
| 11-16                                     | 0                          | 1                              |
| <b>Antep pronotum</b>                     | n=43                       | n=30                           |
| Few dark scales                           | 0                          | 0                              |
| Broad pale scales                         | 43                         | 30                             |
| Pale falcate scales                       | 0                          | 0                              |
| <b>Postpronotum</b>                       | n=43                       | n=30                           |
| No dark scales                            | 25                         | 29                             |
| Few dark scales                           | 16                         | 1                              |
| Dark scales present                       | 2                          | 0                              |
| <b>Subspiracular patch, no. of scales</b> | n=86                       | n=60                           |
| 0                                         | 5                          | 59                             |
| 1-5                                       | 12                         | 1                              |
| 6-10                                      | 29                         | 0                              |
| 11-15                                     | 21                         | 0                              |
| 16-20                                     | 13                         | 0                              |
| 21-25                                     | 4                          | 0                              |
| 26-30                                     | 2                          | 0                              |
| <b>Costa</b>                              | n=43                       | n=30                           |
| Entirely dark                             | 36                         | 1                              |
| Few pale scales                           | 7                          | 12                             |
| Pale scales present, no mark              | 0                          | 11                             |
| Ventrobasal pale mark                     | 0                          | 6                              |
| <b>Hindfemur</b>                          | n=43                       | n=30                           |
| Dark subbasal band                        | 0                          | 30                             |
| Entirely pale basally                     | 43                         | 0                              |
| <b>Hindtarsomere IV</b>                   | n=43                       | n=30                           |
| Entirely dark                             | 0                          | 17                             |
| Few pale scales                           | 0                          | 6                              |
| Pale basal ring incomplete                | 0                          | 6                              |
| Pale basal ring complete                  | 41                         | 0                              |
| No result                                 | 2                          | 1                              |
| <b>Hindtarsomere V</b>                    | n=43                       | n=30                           |
| Entirely dark                             | 29                         | 29                             |
| Few pale scales                           | 10                         | 0                              |
| Pale basal ring incomplete                | 2                          | 0                              |
| Pale basal ring complete                  | 0                          | 0                              |
| No result                                 | 2                          | 1                              |
| <b>Scutum, color of stripes</b>           | n=43                       | n=30                           |
| All golden-yellow                         | 6                          | 29                             |
| Golden-yellow, prescutellar area white    | 37                         | 0                              |
| Silver-white                              | 0                          | 0                              |
| No result                                 | 0                          | 1                              |
| <b>Scutum, length of submedian stripe</b> | n=43                       | n=30                           |
| 3/4 of anterior half of scutum            | 2                          | 0                              |
| 1/1 of anterior half of scutum            | 31                         | 4                              |
| > 1/1 of anterior half of scutum          | 9                          | 25                             |
| No result                                 | 1                          | 1                              |

| <b>Tergite pattern</b>                         | <b><i>Ae. koreicus</i></b> | <b><i>Ae. j. japonicus</i></b> |
|------------------------------------------------|----------------------------|--------------------------------|
| <b>Basomedian patch present on segments</b>    | n=43                       | n=30                           |
| No patch                                       | 0                          | 7                              |
| II                                             | 0                          | 1                              |
| II-V                                           | 0                          | 7                              |
| II-VI                                          | 3                          | 7                              |
| II-VII                                         | 38                         | 6                              |
| No result                                      | 2                          | 2                              |
| <b>Size of basomedian patch</b>                | n=43                       | n=30                           |
| No pale scales                                 | 0                          | 7                              |
| Few pale scales                                | 11                         | 20                             |
| Spots                                          | 14                         | 1                              |
| Bands                                          | 15                         | 0                              |
| Fused with bl spots                            | 1                          | 0                              |
| No result                                      | 2                          | 2                              |
| <b>Basolateral patches present on segments</b> | n=43                       | n=30                           |
| II-VII                                         | 43                         | 30                             |
| No result                                      | 0                          | 0                              |
| <b>Tergit VIII</b>                             | n=43                       | n=30                           |
| Basolateral patches                            | 7                          | 21                             |
| Fused band                                     | 35                         | 7                              |
| No result                                      | 1                          | 2                              |
